# Supplementary material for: Dynamic trends of family-based eldercare vulnerability among older adults in agro-pastoral areas of Xinjiang, China: a longitudinal study
Source: Research Square preprint supplement (doi:10.21203/rs.3.rs-7336900/v1), 2025-09-04
Supplement: Supplementary file 1 [file 6d2fb589bd6181d9e81f3abc.docx]

Supplementary Material 1

Appendix: Survey on Family-Based Eldercare Vulnerability among Older Adults in Agro-Pastoral Areas of Xinjiang, China

Questionnaire ID: ____________

Dear Sir/Madam,

Thank you for taking the time to participate in this survey. The purpose of this study is to understand the current status of family-based eldercare in agro-pastoral areas of Xinjiang and to identify the challenges and needs of older adults in accessing care. All responses will be anonymous and kept strictly confidential. The questionnaire will take approximately 20 minutes to complete. Please answer each question based on your personal and household circumstances. Your participation will contribute to improving eldercare policies and services in your region.

**Instructions:**

- This questionnaire consists of two parts.

- Please mark (√) the option that best describes your situation or fill in the blank as appropriate.

- Unless otherwise specified, only one answer should be selected for each question.

**Part I: General Information**

**Respondent Details**

- ID Number: __________________________

- Contact Number: _______________________

- Home Address: _________________________

County ________ Township/Town ________ Village ________ No. ________

1. Gender:

A. Male  B. Female

2. Age:

A. 60–64 B. 65–69 C. 70–74 D. 75–79 E. ≥80 years

3. Marital Status:

A. Never married B. Married (spouse alive) C. Widowed D. Divorced E. Remarried

4. Education Level:

A. Illiterate/Semi-illiterate B. Primary school C. Junior high school D. Senior high/technical secondary E. College or above

5. Pre-retirement Occupation:

A. Farmer B. Herder C. Government/institution employee D. Self-employed

E. Unemployed F. Other (please specify): ____________

6. Living Arrangement:

A. Living alone B. Living with spouse only C. Living with spouse and children

D. Living with children only E. Living with others

7. Primary Source of Financial Support for Old-Age Care:

A. Pension B. Support from children/relatives C. Government/collective assistance

D. Labor income E. Other

8. Usual Healthcare Facility Used:

A. Village clinic B. Private clinic C. Pharmacy D. Township health center

E. County/district secondary hospital F. Prefecture/autonomous region tertiary hospital

9. Medical Expense Payment Method:

A. Urban–rural resident medical insurance B. Urban employee medical insurance

C. Public medical care D. Medical aid E. Commercial insurance F. Out-of-pocket

G. Other

**Part II: Family-Based Eldercare Vulnerability**

1.Out-of-pocket medical expenses paid by your household in the past year

(including outpatient, inpatient, medication costs, excluding transportation or nutrition):

____________ Yuan

2. Total outstanding debt owed to banks, individuals, or units:

____________ Yuan

3. Did any natural disaster occur in your household in the past year?

A. Yes B. No

4. Did you experience the loss of a spouse in the past year?

A. Yes B. No

5. Current work status:

A. No longer working B. Employed

6. In the past year, how often did you care for your grandchildren?

A. Almost never B. Once every few months C. Once every 2–4 weeks

D. At least once a week E. Almost daily

7. Activities of Daily Living (ADL):

Please indicate your level of independence for the following 14 tasks.

| Task | Completely Independent | Some Difficulty | Needs Help | Unable to Do |
| --- | --- | --- | --- | --- |
| 1. Taking public transport | 1 | 2 | 3 | 4 |
| 2. Walking to nearby places | 1 | 2 | 3 | 4 |
| 3. Cooking | 1 | 2 | 3 | 4 |
| 4. Housekeeping | 1 | 2 | 3 | 4 |
| 5. Taking medications | 1 | 2 | 3 | 4 |
| 6. Eating | 1 | 2 | 3 | 4 |
| 7. Dressing/undressing | 1 | 2 | 3 | 4 |
| 8. Grooming (brushing teeth, combing hair) | 1 | 2 | 3 | 4 |
| 9. Doing laundry | 1 | 2 | 3 | 4 |
| 10. Bathing (water prepared) | 1 | 2 | 3 | 4 |
| 11. Shopping | 1 | 2 | 3 | 4 |
| 12. Using toilet on time | 1 | 2 | 3 | 4 |
| 13. Making phone calls | 1 | 2 | 3 | 4 |
| 14. Managing money | 1 | 2 | 3 | 4 |

8. Do you have any major illness?

A. Yes B. No

9. Number of chronic diseases: ____________

10. Were you hospitalized due to illness in the past year?

A. Yes B. No

11. Vision status:

A. Excellent B. Good C. Fair D. Poor E. Very poor

12. Hearing status:

A. Excellent B. Good C. Fair D. Poor E. Very poor

13. Height: ________ m Weight: ________ kg BMI: ________ kg/m²

14. Self-rated health status:

A. Excellent B. Good C. Fair D. Poor E. Very poor

15. Overall life satisfaction:

A. Very satisfied B. Satisfied C. Neutral D. Dissatisfied E. Very dissatisfied

16. Depression Scale (CES-D-10):

Please indicate how often you experienced the following feelings or behaviors in the past week.

| Item | Rarely or none of the time (<1 day) | Some or a little of the time (1–2 days) | Occasionally or a moderate amount of time (3–4 days) | Most or all of the time (5–7 days) |
| --- | --- | --- | --- | --- |
| 1. I was bothered by things that usually don’t bother me. | 0 | 1 | 2 | 3 |
| 1. I had trouble keeping my mind on what I was doing. | 0 | 1 | 2 | 3 |
| 1. I felt depressed. | 0 | 1 | 2 | 3 |
| 1. I felt that everything I did was an effort. | 0 | 1 | 2 | 3 |
| 1. I felt hopeful about the future. | 0 | 1 | 2 | 3 |
| 1. I felt fearful. | 0 | 1 | 2 | 3 |
| 1. My sleep was restless. | 0 | 1 | 2 | 3 |
| 1. I was happy. | 0 | 1 | 2 | 3 |
| 1. I felt lonely. | 0 | 1 | 2 | 3 |
| 1. I could not “get going.” | 0 | 1 | 2 | 3 |

17. Cultivated land area: ____________ mu

18. Pasture area: ____________ mu

19. Total value of household assets (including savings, livestock, agricultural products, etc.):

____________ Yuan

20. Total annual household income (including pensions, subsidies, social assistance, support from relatives, labor income, rental income, etc.):

____________ Yuan

21. Current housing floor area: ____________ m²

22. Number of permanent household members: ____________

23. Number of household laborers: ____________

24. Number of children: ____________

25. Frequency of receiving help with housework or daily care in the past year:

A. Almost never B. Once every few months C. Once every 2–4 weeks

D. At least once a week E. Almost daily

26. Perceived level of care from your children:

A. None B. Somewhat inadequate C. Neutral D. Adequate E. Very adequate

27. Participation in recreational activities in the past year:

| Activity | Never | Rarely | Weekly | Daily |
| --- | --- | --- | --- | --- |
| 1. Doing housework | 0 | 1 | 2 | 3 |
| 2. Outdoor activities | 0 | 1 | 2 | 3 |
| 3. Gardening/pet keeping | 0 | 1 | 2 | 3 |
| 4. Reading books/newspapers | 0 | 1 | 2 | 3 |
| 5. Raising poultry/livestock | 0 | 1 | 2 | 3 |
| 6. Watching TV/listening to radio | 0 | 1 | 2 | 3 |

28. Participation in social activities in the past year:

| Activity | Never | Rarely | Weekly | Daily |
| --- | --- | --- | --- | --- |
| 1. Visiting friends/neighbors | 0 | 1 | 2 | 3 |
| 2. Playing mahjong/chess/cards or going to community activity centers | 0 | 1 | 2 | 3 |
| 3. Helping relatives/friends/neighbors who do not live with you | 0 | 1 | 2 | 3 |
| 4. Dancing, exercising, or practicing Qigong | 0 | 1 | 2 | 3 |
| 5. Participating in village committee or community organizations | 0 | 1 | 2 | 3 |
| 6. Volunteering or charity activities | 0 | 1 | 2 | 3 |
| 7. Caring for patients or disabled persons who do not live with you | 0 | 1 | 2 | 3 |
| 8. Attending school or training courses | 0 | 1 | 2 | 3 |
| 9. Investing (stocks, funds, etc.) | 0 | 1 | 2 | 3 |
| 10. Using the Internet | 0 | 1 | 2 | 3 |
| 11. Other social activities (please specify): ____________ | 0 | 1 | 2 | 3 |
|  |  |  |  |  |

29. Number of relatives you interact with daily, discuss personal matters with, or receive help from: ____________

30. Number of friends you interact with daily, discuss personal matters with, or receive help from: ____________

31. Time (in minutes) required to reach the nearest healthcare facility:

A. ≥121 B. 61–120 C. 31–60 D. 16–30 E. ≤15

32. Satisfaction with current healthcare services:

A. Very dissatisfied B. Dissatisfied C. Neutral D. Satisfied E. Very satisfied
